# Supplementary material for: Early Behavioral Abnormalities and Perinatal Alterations of PTEN/AKT Pathway in Valproic Acid Autism Model Mice
Source: PubMed Central journal article supplement (PMC4829151; doi:10.1371/journal.pone.0153298), 2016-04-12

**S9 Figure.** Whole blots of representative data in Fig. 4C and 4D.

**P13 Hippocampus**

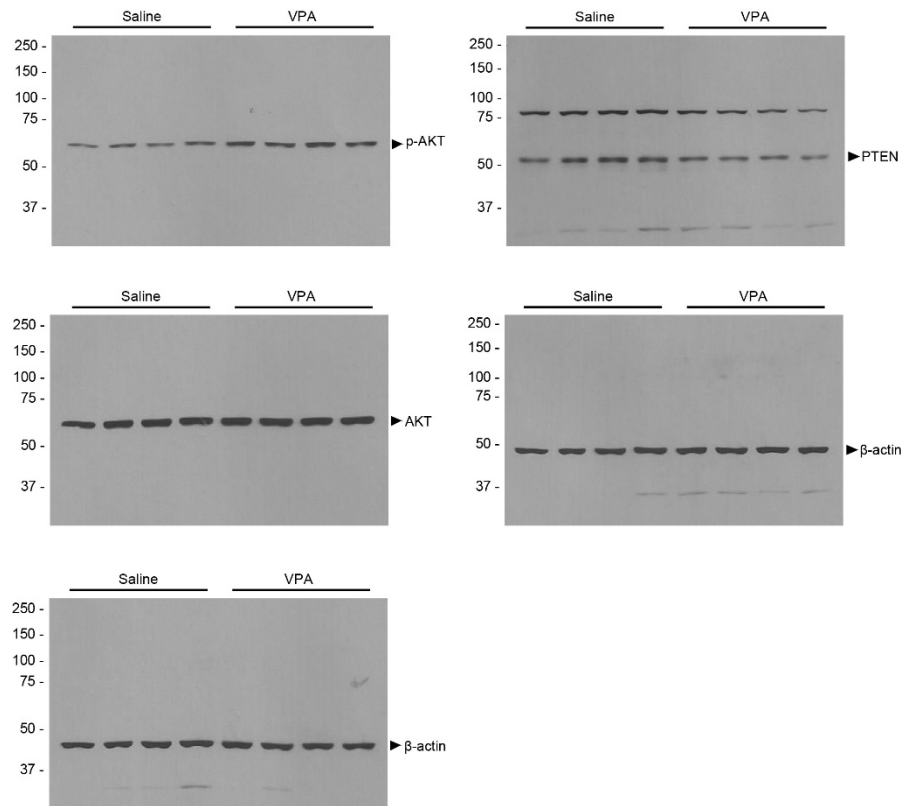

**P13 Cortex**

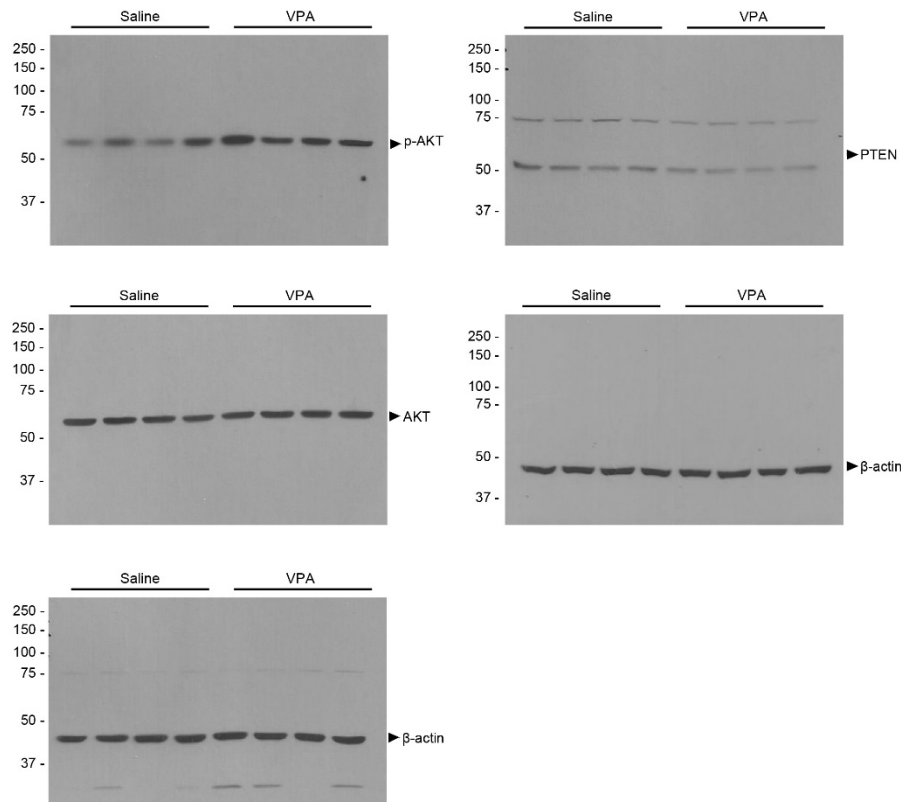

Supplement: pone.0153298.s002.pdf [file pone.0153298.s002.pdf]
