# Supplementary material for: Early Behavioral Abnormalities and Perinatal Alterations of PTEN/AKT Pathway in Valproic Acid Autism Model Mice
Source: PubMed Central journal article supplement (PMC4829151; doi:10.1371/journal.pone.0153298), 2016-04-12
Supplement: pone.0153298.s003.pdf [file pone.0153298.s003.pdf]

**S1 Table.** Raw data of body weight on P5-13.

**Body weight on P5-13 (g)**

| <b>Group</b> | <b>P5</b> | <b>P6</b> | <b>P7</b> | <b>P8</b> | <b>P9</b> | <b>P10</b> | <b>P11</b> | <b>P12</b> | <b>P13</b> |
|--------------|-----------|-----------|-----------|-----------|-----------|------------|------------|------------|------------|
| SAL          | 4.3       | 4.7       | 5.3       | 5.7       | 6.5       | 6.9        | 7.5        | 8.1        | 8.3        |
| SAL          | 4.5       | 4.9       | 5.2       | 5.6       | 6.1       | 6.5        | 7.1        | 7.7        | 8.1        |
| SAL          | 4.3       | 4.9       | 5.2       | 5.9       | 6.3       | 7.0        | 7.5        | 7.9        | 8.4        |
| SAL          | 5.0       | 5.6       | 6.5       | 7.3       | 7.8       | 8.4        | 9.0        | 9.2        | 9.6        |
| SAL          | 4.9       | 5.8       | 6.7       | 7.5       | 7.8       | 8.4        | 9.0        | 9.5        | 9.9        |
| SAL          | 5.1       | 5.8       | 6.5       | 7.3       | 7.5       | 8.3        | 9.0        | 9.3        | 9.6        |
| SAL          | 4.8       | 5.6       | 6.5       | 7.3       | 7.6       | 8.2        | 8.9        | 9.4        | 9.7        |
| SAL          | 4.9       | 5.7       | 6.7       | 7.3       | 7.4       | 8.3        | 9.1        | 9.6        | 10.0       |
| SAL          | 4.0       | 4.7       | 5.4       | 6.0       | 6.5       | 7.0        | 7.4        | 7.5        | 7.8        |
| VPA          | 4.2       | 5.0       | 5.6       | 6.4       | 7.0       | 7.6        | 8.2        | 8.7        | 9.2        |
| VPA          | 3.9       | 4.5       | 5.5       | 6.2       | 6.9       | 7.6        | 8.3        | 9.1        | 9.3        |
| VPA          | 4.3       | 4.9       | 5.7       | 6.3       | 7.1       | 7.6        | 8.1        | 8.6        | 9.0        |
| VPA          | 4.7       | 5.2       | 5.9       | 6.8       | 7.4       | 8.0        | 8.5        | 9.3        | 9.6        |
| VPA          | 4.5       | 5.2       | 6.0       | 6.4       | 7.3       | 7.9        | 8.4        | 9.1        | 9.4        |
| VPA          | 3.8       | 4.0       | 4.8       | 5.2       | 5.7       | 6.1        | 6.4        | 6.8        | 7.1        |
| VPA          | 4.2       | 4.9       | 5.3       | 5.9       | 6.5       | 6.8        | 7.0        | 7.4        | 7.5        |
| VPA          | 3.6       | 4.0       | 4.6       | 5.0       | 5.4       | 5.9        | 6.3        | 6.7        | 7.0        |
| VPA          | 3.6       | 4.2       | 4.8       | 5.3       | 5.7       | 6.1        | 6.5        | 6.9        | 7.0        |
| VPA          | 4.0       | 4.6       | 5.1       | 5.6       | 6.2       | 6.2        | 6.1        | 7.1        | 7.5        |
