# Supplementary material for: Early Behavioral Abnormalities and Perinatal Alterations of PTEN/AKT Pathway in Valproic Acid Autism Model Mice
Source: PubMed Central journal article supplement (PMC4829151; doi:10.1371/journal.pone.0153298), 2016-04-12
Supplement: pone.0153298.s004.pdf [file pone.0153298.s004.pdf]

**S2 Table.** Raw data of self-righting on P5-9.

**Self-righting on P5-9 (sec)**

| <b>Group</b> | <b>P5</b> | <b>P6</b> | <b>P7</b> | <b>P8</b> | <b>P9</b> |
|--------------|-----------|-----------|-----------|-----------|-----------|
| SAL          | 25.97     | 4.53      | 1.59      | 0.64      | 1.27      |
| SAL          | 25.07     | 14.08     | 3.03      | 1.81      | 0.57      |
| SAL          | 27.03     | 21.14     | 3.49      | 1.86      | 0.72      |
| SAL          | 16.99     | 15.95     | 4.01      | 1.18      | 1.26      |
| SAL          | 17.13     | 19.59     | 19.90     | 1.22      | 0.63      |
| SAL          | 17.53     | 14.77     | 3.62      | 1.75      | 0.81      |
| SAL          | 15.13     | 8.91      | 1.74      | 1.97      | 1.01      |
| SAL          | 14.71     | 17.86     | 3.23      | 6.76      | 0.80      |
| SAL          | 18.49     | 6.60      | 10.86     | 11.69     | 1.18      |
| VPA          | 23.24     | 20.57     | 15.21     | 12.72     | 5.52      |
| VPA          | 8.66      | 12.98     | 9.69      | 3.28      | 2.12      |
| VPA          | 21.44     | 22.93     | 13.71     | 13.78     | 2.68      |
| VPA          | 6.01      | 13.18     | 5.16      | 9.89      | 2.71      |
| VPA          | 20.85     | 6.36      | 21.38     | 3.23      | 2.69      |
| VPA          | 30.00     | 22.80     | 6.23      | 30.00     | 14.22     |
| VPA          | 18.67     | 15.56     | 21.51     | 19.16     | 2.02      |
| VPA          | 23.31     | 4.61      | 11.77     | 1.65      | 2.07      |
| VPA          | 21.38     | 30.00     | 23.94     | 9.11      | 11.57     |
| VPA          | 30.00     | 22.44     | 2.48      | 3.93      | 8.77      |
