# Supplementary material for: Early Behavioral Abnormalities and Perinatal Alterations of PTEN/AKT Pathway in Valproic Acid Autism Model Mice
Source: PubMed Central journal article supplement (PMC4829151; doi:10.1371/journal.pone.0153298), 2016-04-12
Supplement: pone.0153298.s005.pdf [file pone.0153298.s005.pdf]

**S3 Table.** Raw data of eye opening on P12-16.

**Eye opening score on P12-16**

| <b>Group</b> | <b>P5</b> | <b>P6</b> | <b>P7</b> | <b>P8</b> | <b>P9</b> |
|--------------|-----------|-----------|-----------|-----------|-----------|
| SAL          | 0         | 1         | 2         | 2         | 2         |
| SAL          | 0         | 0         | 2         | 2         | 2         |
| SAL          | 0         | 0         | 1         | 2         | 2         |
| SAL          | 0         | 0         | 1         | 2         | 2         |
| SAL          | 0         | 2         | 2         | 2         | 2         |
| SAL          | 0         | 2         | 2         | 2         | 2         |
| SAL          | 0         | 1         | 2         | 2         | 2         |
| SAL          | 0         | 2         | 2         | 2         | 2         |
| SAL          | 0         | 0         | 2         | 2         | 2         |
| VPA          | 0         | 0         | 0         | 1         | 1         |
| VPA          | 0         | 0         | 2         | 2         | 2         |
| VPA          | 0         | 0         | 1         | 2         | 2         |
| VPA          | 0         | 0         | 1         | 2         | 2         |
| VPA          | 0         | 0         | 2         | 2         | 2         |
| VPA          | 0         | 0         | 2         | 2         | 2         |
| VPA          | 0         | 0         | 1         | 2         | 2         |
| VPA          | 0         | 0         | 1         | 2         | 2         |
| VPA          | 0         | 0         | 1         | 2         | 2         |
| VPA          | 0         | 0         | 1         | 2         | 2         |
| VPA          | 0         | 1         | 2         | 2         | 2         |
