# Supplementary material for: Early Behavioral Abnormalities and Perinatal Alterations of PTEN/AKT Pathway in Valproic Acid Autism Model Mice
Source: PubMed Central journal article supplement (PMC4829151; doi:10.1371/journal.pone.0153298), 2016-04-12
Supplement: pone.0153298.s006.pdf [file pone.0153298.s006.pdf]

**S4 Table.** Raw data of maternal scent preference.

**Maternal scent preference (sec)**

| <b>Group</b> | <b>Familiar</b> | <b>Center</b> | <b>Stranger</b> |
|--------------|-----------------|---------------|-----------------|
| SAL          | 24.71           | 35.59         | 0.00            |
| SAL          | 38.68           | 22.10         | 0.00            |
| SAL          | 31.03           | 12.73         | 16.55           |
| SAL          | 36.69           | 10.59         | 15.15           |
| SAL          | 32.46           | 23.99         | 4.95            |
| SAL          | 21.90           | 38.28         | 0.00            |
| SAL          | 13.47           | 46.75         | 0.00            |
| SAL          | 47.04           | 12.77         | 0.00            |
| SAL          | 11.15           | 41.01         | 7.67            |
| VPA          | 51.61           | 8.65          | 0.00            |
| VPA          | 52.70           | 8.47          | 0.00            |
| VPA          | 16.84           | 9.77          | 34.12           |
| VPA          | 23.53           | 8.86          | 29.28           |
| VPA          | 0.00            | 20.35         | 37.01           |
| VPA          | 6.35            | 48.82         | 5.13            |
| VPA          | 30.73           | 13.63         | 16.52           |
| VPA          | 7.63            | 41.46         | 10.64           |
| VPA          | 0.00            | 8.27          | 44.99           |
| VPA          | 7.70            | 10.13         | 26.80           |
