# Supplementary material for: Early Behavioral Abnormalities and Perinatal Alterations of PTEN/AKT Pathway in Valproic Acid Autism Model Mice
Source: PubMed Central journal article supplement (PMC4829151; doi:10.1371/journal.pone.0153298), 2016-04-12
Supplement: pone.0153298.s007.pdf [file pone.0153298.s007.pdf]

**S5 Table.** Raw data of body and brain weight on E18.

**Body and brain weight on E18 ( $\mu\text{g}$ )**

| <b>Group</b> | <b>Body</b> | <b>Brain</b> | <b>Body/brain ratio</b> |
|--------------|-------------|--------------|-------------------------|
| SAL          | 1338.2      | 75.3         | 0.0563                  |
| SAL          | 1249.0      | 73.6         | 0.0589                  |
| SAL          | 1313.6      | 77.7         | 0.0592                  |
| SAL          | 1124.2      | 74.7         | 0.0664                  |
| SAL          | 1205.3      | 68.5         | 0.0568                  |
| SAL          | 1260.9      | 71.4         | 0.0566                  |
| SAL          | 1282.0      | 67.4         | 0.0526                  |
| SAL          | 1321.6      | 66.6         | 0.0504                  |
| SAL          | 1273.8      | 70.6         | 0.0554                  |
| SAL          | 1238.5      | 72.3         | 0.0584                  |
| VPA          | 926.7       | 68.2         | 0.0736                  |
| VPA          | 741.5       | 55.7         | 0.0751                  |
| VPA          | 837.3       | 56.5         | 0.0675                  |
| VPA          | 823.4       | 58.3         | 0.0708                  |
| VPA          | 986.6       | 68.0         | 0.0689                  |
| VPA          | 793.5       | 50.7         | 0.0639                  |
| VPA          | 851.8       | 66.6         | 0.0782                  |
| VPA          | 1056.4      | 68.2         | 0.0646                  |
| VPA          | 963.0       | 53.8         | 0.0559                  |
