# Supplementary material for: Early Behavioral Abnormalities and Perinatal Alterations of PTEN/AKT Pathway in Valproic Acid Autism Model Mice
Source: PubMed Central journal article supplement (PMC4829151; doi:10.1371/journal.pone.0153298), 2016-04-12
Supplement: pone.0153298.s008.pdf [file pone.0153298.s008.pdf]

**S6 Table.** Raw data of body and brain weight on P13.

**Body and brain weight on P13 ( $\mu\text{g}$ )**

| <b>Group</b> | <b>Body</b> | <b>Brain</b> | <b>Body/brain ratio</b> |
|--------------|-------------|--------------|-------------------------|
| SAL          | 9600        | 405.6        | 0.0423                  |
| SAL          | 9900        | 377.3        | 0.0381                  |
| SAL          | 9600        | 375.0        | 0.0391                  |
| SAL          | 10000       | 397.1        | 0.0397                  |
| SAL          | 7800        | 388.6        | 0.0498                  |
| SAL          | 9200        | 346.4        | 0.0377                  |
| SAL          | 9300        | 334.3        | 0.0359                  |
| SAL          | 9000        | 357.6        | 0.0397                  |
| SAL          | 9600        | 328.0        | 0.0342                  |
| SAL          | 9400        | 344.6        | 0.0367                  |
| VPA          | 7100        | 326.4        | 0.0460                  |
| VPA          | 7500        | 338.8        | 0.0452                  |
| VPA          | 7000        | 310.1        | 0.0443                  |
| VPA          | 7000        | 326.8        | 0.0467                  |
| VPA          | 7000        | 309.9        | 0.0443                  |
| VPA          | 9600        | 405.6        | 0.0423                  |
| VPA          | 9900        | 377.3        | 0.0381                  |
| VPA          | 9600        | 375.0        | 0.0391                  |
| VPA          | 10000       | 397.1        | 0.0397                  |
