# Supplementary material for: Early Behavioral Abnormalities and Perinatal Alterations of PTEN/AKT Pathway in Valproic Acid Autism Model Mice
Source: PubMed Central journal article supplement (PMC4829151; doi:10.1371/journal.pone.0153298), 2016-04-12
Supplement: pone.0153298.s009.pdf [file pone.0153298.s009.pdf]

**S7 Table.** Raw data of spine density quantification of primary cultures.

**Spine density (spines/10 $\mu$ m)**

| <b>Group</b> | <b>Spines/10<math>\mu</math>m</b> | <b>Group</b> | <b>Spines/10<math>\mu</math>m</b> |
|--------------|-----------------------------------|--------------|-----------------------------------|
| SAL          | 7.70                              | VPA          | 10.17                             |
| SAL          | 6.75                              | VPA          | 9.75                              |
| SAL          | 6.88                              | VPA          | 10.50                             |
| SAL          | 7.93                              | VPA          | 10.58                             |
| SAL          | 7.07                              | VPA          | 9.50                              |
| SAL          | 7.00                              | VPA          | 11.21                             |
| SAL          | 7.50                              | VPA          | 10.90                             |
| SAL          | 7.50                              | VPA          | 10.50                             |
| SAL          | 6.67                              | VPA          | 10.80                             |
| SAL          | 7.70                              | VPA          | 9.13                              |
| SAL          | 7.58                              | VPA          | 11.67                             |
| SAL          | 7.63                              | VPA          | 11.21                             |
| SAL          | 7.75                              | VPA          | 11.19                             |
| SAL          | 6.92                              |              |                                   |
| SAL          | 7.83                              |              |                                   |
| SAL          | 6.90                              |              |                                   |
| SAL          | 7.50                              |              |                                   |
| SAL          | 7.20                              |              |                                   |
